# Supplementary material for: CuFeO2–NiFe2O4 hybrid electrode for lithium-ion batteries with ultra-stable electrochemical performance
Source: Royal Society of Chemistry journal article supplement (doi:10.1039/c9ra03187a), 2019-01-01
Supplement: c9ra03187a1.pdf [file c9ra03187a1.pdf]

# **CuFeO<sub>2</sub>-NiFe<sub>2</sub>O<sub>4</sub> hybrid electrode for lithium-ion batteries with ultra-stable electrochemical performance**

Jun Young Cheong <sup>a</sup>, Seokwon Lee <sup>b</sup>, Jiyoung Lee <sup>a</sup>, Haeseong Lim<sup>a</sup>, Su-Ho Cho <sup>a</sup>, Doh C. Lee <sup>b</sup> and Il-Doo Kim <sup>\*a</sup>

<sup>a</sup> Department of Materials Science & Engineering, Korea Advanced Institute of Science & Technology, 335 Science Road, Daejeon, 305-701, Republic of Korea

<sup>b</sup> Department of Chemical and Biomolecular Engineering, Korea Advanced Institute of Science & Technology, 335 Science Road, Daejeon, 305-701, Republic of Korea

\*Email address: idkim@kaist.ac.kr (I. D. Kim)

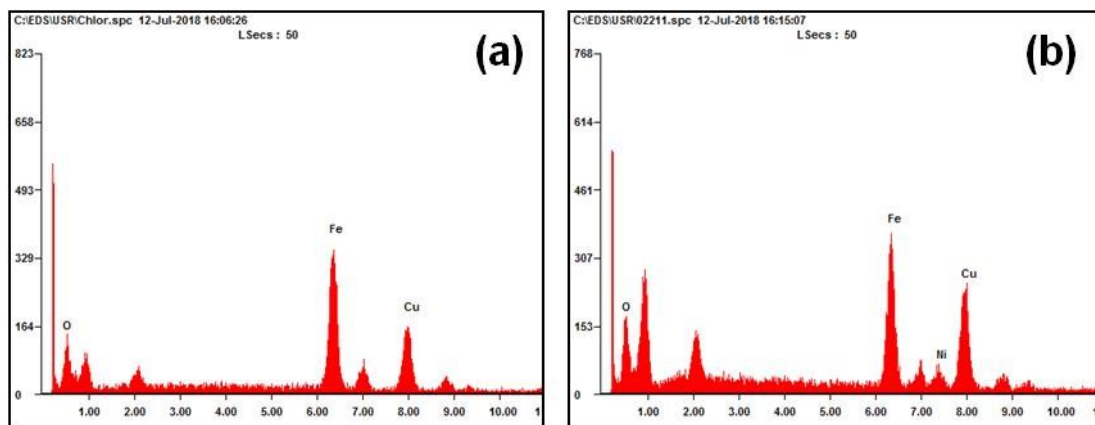

**Fig. S1.** SEM-EDS analysis of (a) CFO and (b) CFO-Ni (0.4).

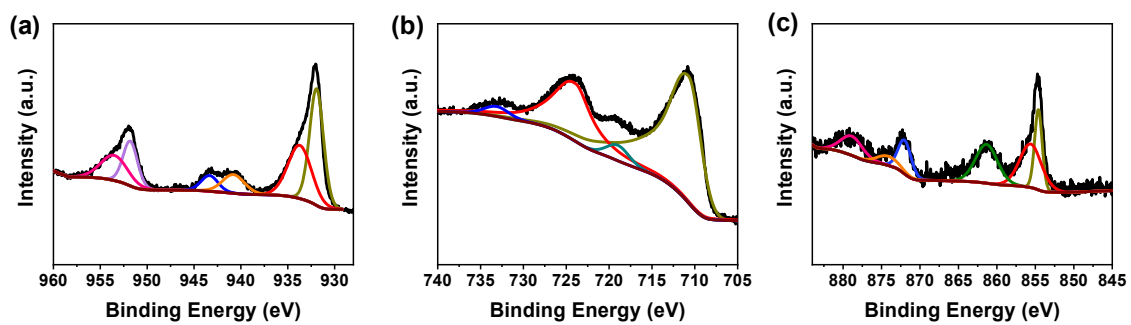

**Fig. S2.** XPS spectrum for (a) Cu, (b) Fe, and (c) Ni for CFO-Ni (0.4).

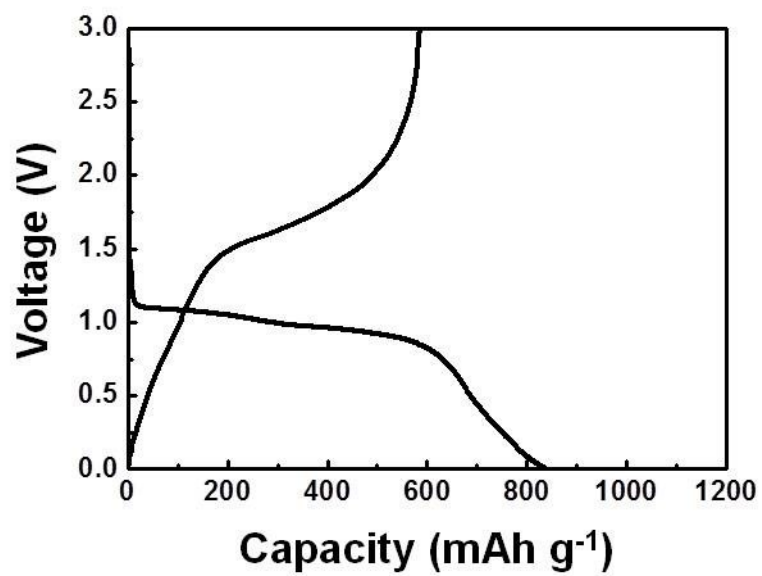

**Fig. S3.** Charge and discharge profile of CFO in the formation cycle.

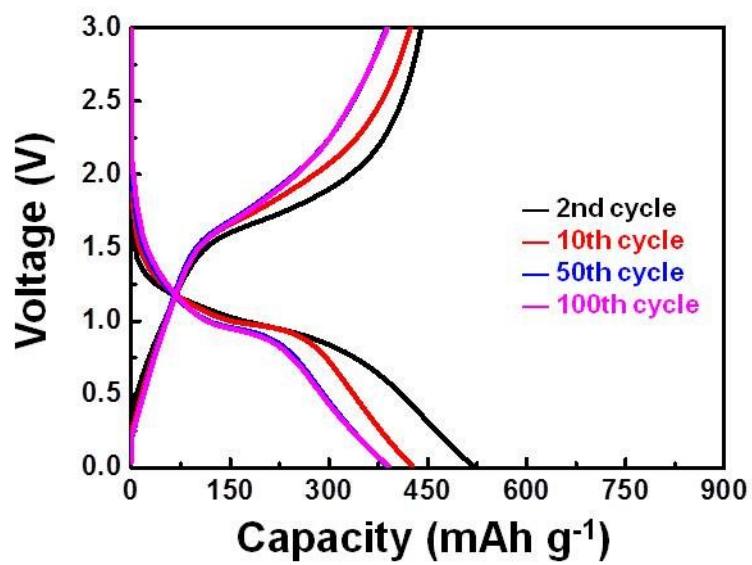

**Fig. S4.** Charge and discharge profile of CFO in the 2nd, 10th, 50th, and 100th cycle.

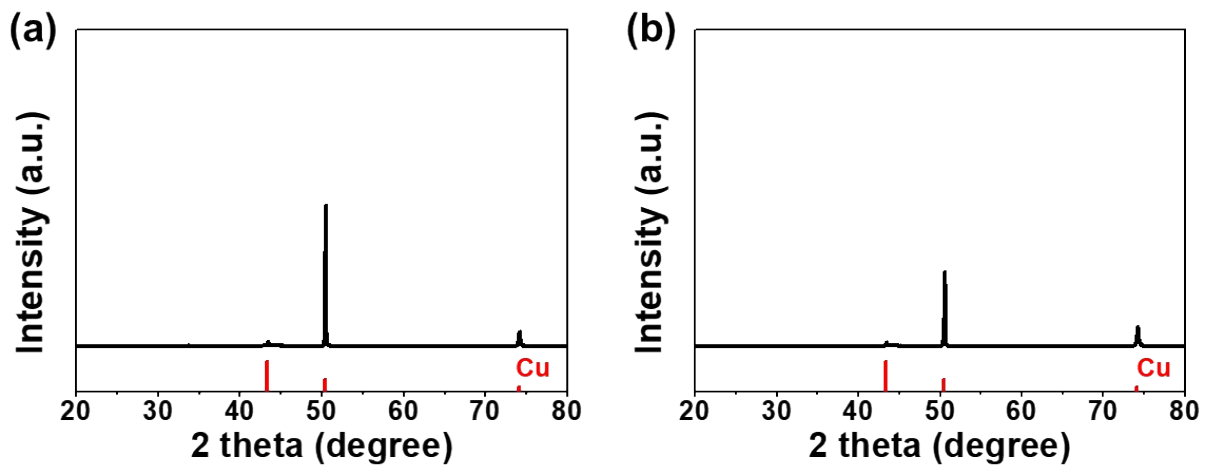

**Fig. S5.** *Ex situ* XRD patterns of (a) CFO and (b) CFO-Ni (0.4) after cycling.

**Table S1.** Comparison of electrochemical performance for Co<sub>3</sub>O<sub>4</sub> NPs by fast formation cycling with previously reported Co<sub>3</sub>O<sub>4</sub>-based electrodes.

| <b>Sample</b>                | <b>Capacity<br/>(mAh g<sup>-1</sup>)</b> | <b>Current Density<br/>(mA g<sup>-1</sup>)</b> | <b>Cycles</b> | <b>References</b> |
|------------------------------|------------------------------------------|------------------------------------------------|---------------|-------------------|
| CuFeO <sub>2</sub> @rGO      | 587                                      | 200                                            | 100           | [1]               |
| CuFeO <sub>2</sub> /graphene | 670                                      | 141.6                                          | 100           | [2]               |
| CuFeO <sub>2</sub> (650 °C)  | 475                                      | 354                                            | 100           | [3]               |
| <b>CFO-Ni (0.4)</b>          | <b>147</b>                               | <b>5000</b>                                    | <b>800</b>    | <b>This Work</b>  |
| <b>CFO-Ni (0.4)</b>          | <b>500</b>                               | <b>500</b>                                     | <b>100</b>    | <b>This Work</b>  |

## References

- [1] J. Wang, Q. Deng, M. Li, K. Jiang, J. Zhang, Z. Hu, J. Chu, Copper ferrites@reduced graphene oxide anode materials for advanced lithium storage applications, *Sci. Rep.* 7 (2017) 8903.
- [2] Y. Dong, C. Cao, Y.-S. Chui, J.A. Zapien, Facile hydrothermal synthesis of  $\text{CuFeO}_2$  hexagonal platelets/rings and graphene composites as anode materials for lithium ion batteries, *Chem. Commun.* 50 (2014) 10151-10154.
- [3] L. Lu, J.-Z. Wang, X.-B. Zhu, X.-W. Gao, H.-K. Liu, High capacity and high rate capability of nanostructured  $\text{CuFeO}_2$  anode materials for lithium-ion batteries, *J. Power Sources* 196 (2011) 7025-7029.
